# Supplementary material for: Methods and Tools Used for Biosecurity Assessment in Livestock Farms in Africa: A Scoping Review
Source: Transbound Emerg Dis. 2024 Apr 16;2024:5524022. doi: 10.1155/2024/5524022 (PMC12016981; doi:10.1155/2024/5524022)
Supplement: Supplementary 1 — Search strategies performed in each database. [file 5524022.f1.pdf]

| Study ID | Author | Year of publication | Journal name |
|----------|--------|---------------------|--------------|
|----------|--------|---------------------|--------------|



Language of publication    Country where the study took place



**Study design (cross sectional, longitudinal)**

**Animal species study Level1 (Cattle, poultry, Pig, Goats)**



**Animal types studies Level 2 (heifer, fattening Pig, Broiler, backyard poultr Sample size (nber of farms)**



Sample strategy for farm selection (rar



**Animal production system (Intensive, semi-intensive, extensive, Smallholders, Mixed, NR)**



The assessment concern aggregate Who administ Field study of Who respond Type of survey Survey face to



Survey with o if no with visi if face to face Survey done ı Survey done ı Use of estima Use of Scoring



Use of descrip Is there feedb Impact of bio: If yes, impact How the impa Any comments





\_\_\_\_\_
